# Supplementary figures and images for: Circadian Regulator-Mediated Molecular Subtypes Depict the Features of Tumor Microenvironment and Indicate Prognosis in Head and Neck Squamous Cell Carcinoma
Source: Hindawi journal article supplement (doi:10.1155/2023/9946911), 2023-06-12

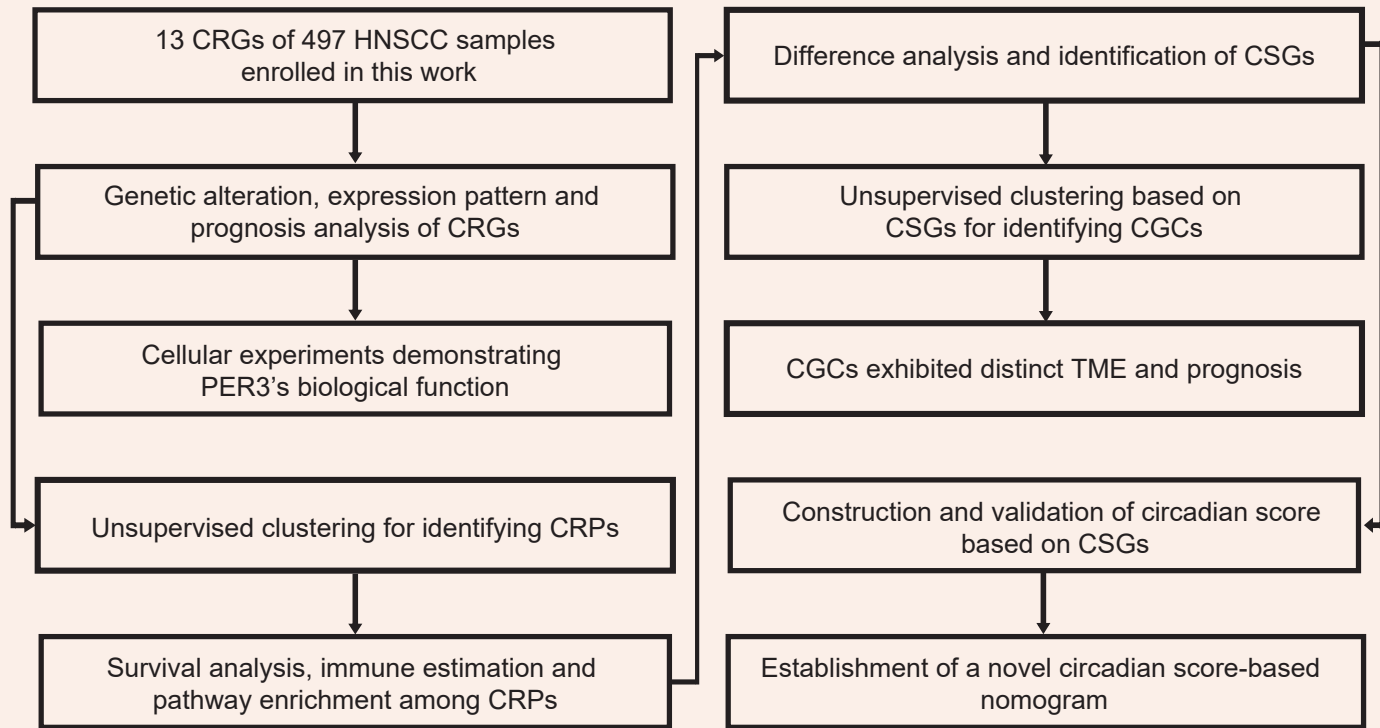

Supplement: f1 [file 9946911.f1.zip]

**A**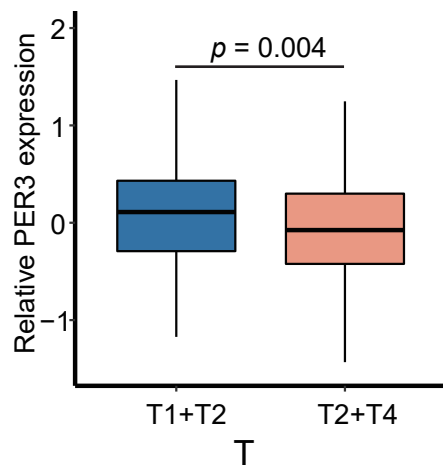**B**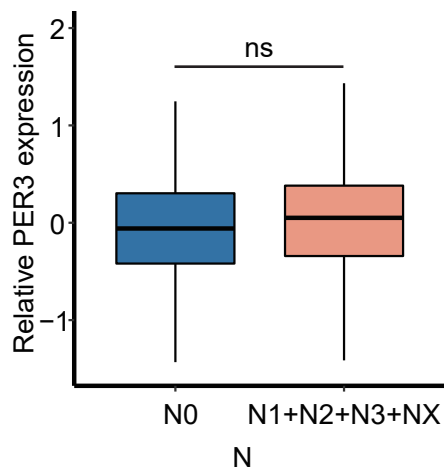**C**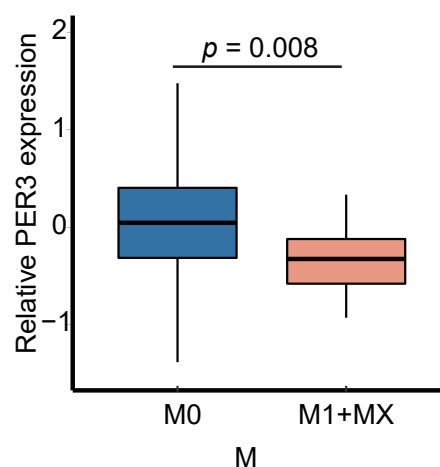**D**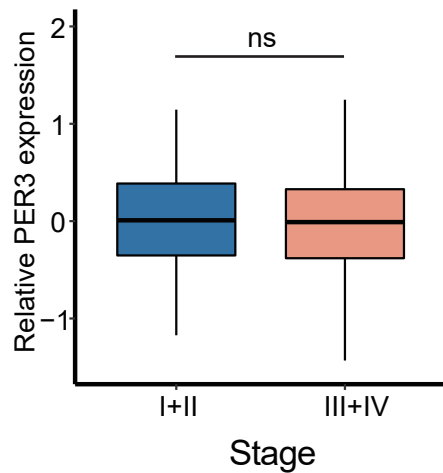**E**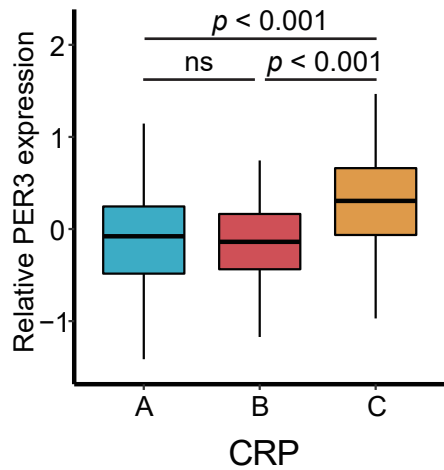**F**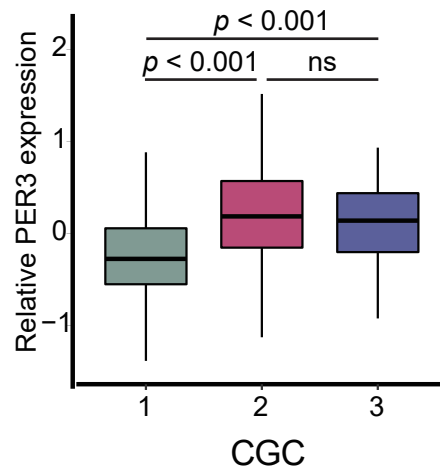

Supplement: f1 [file 9946911.f1.zip]

A

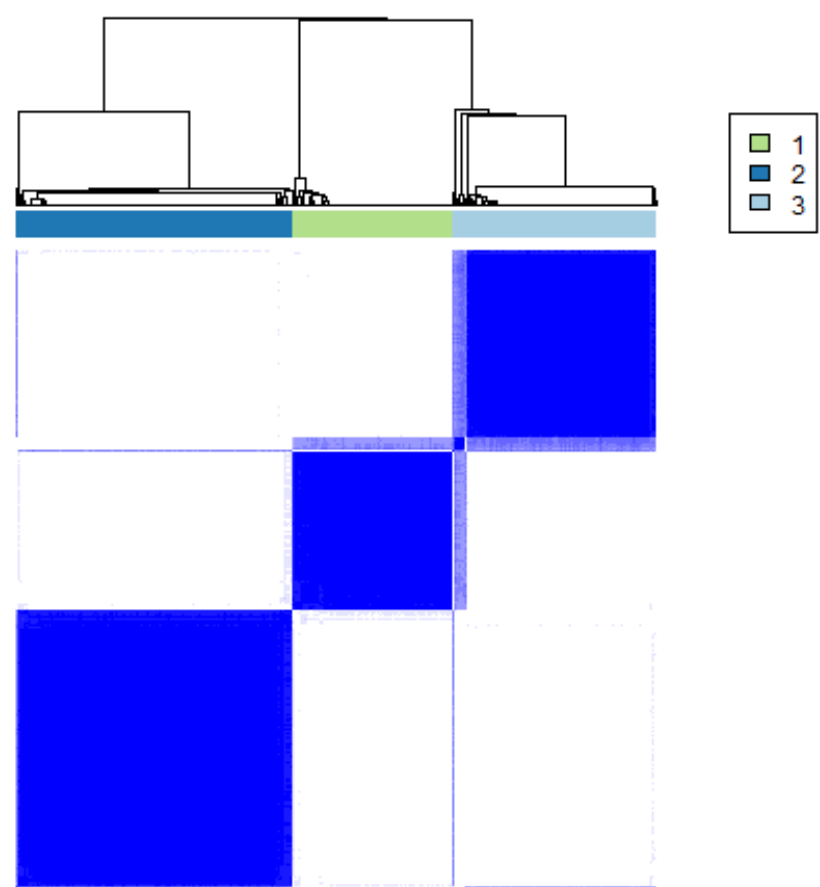

B

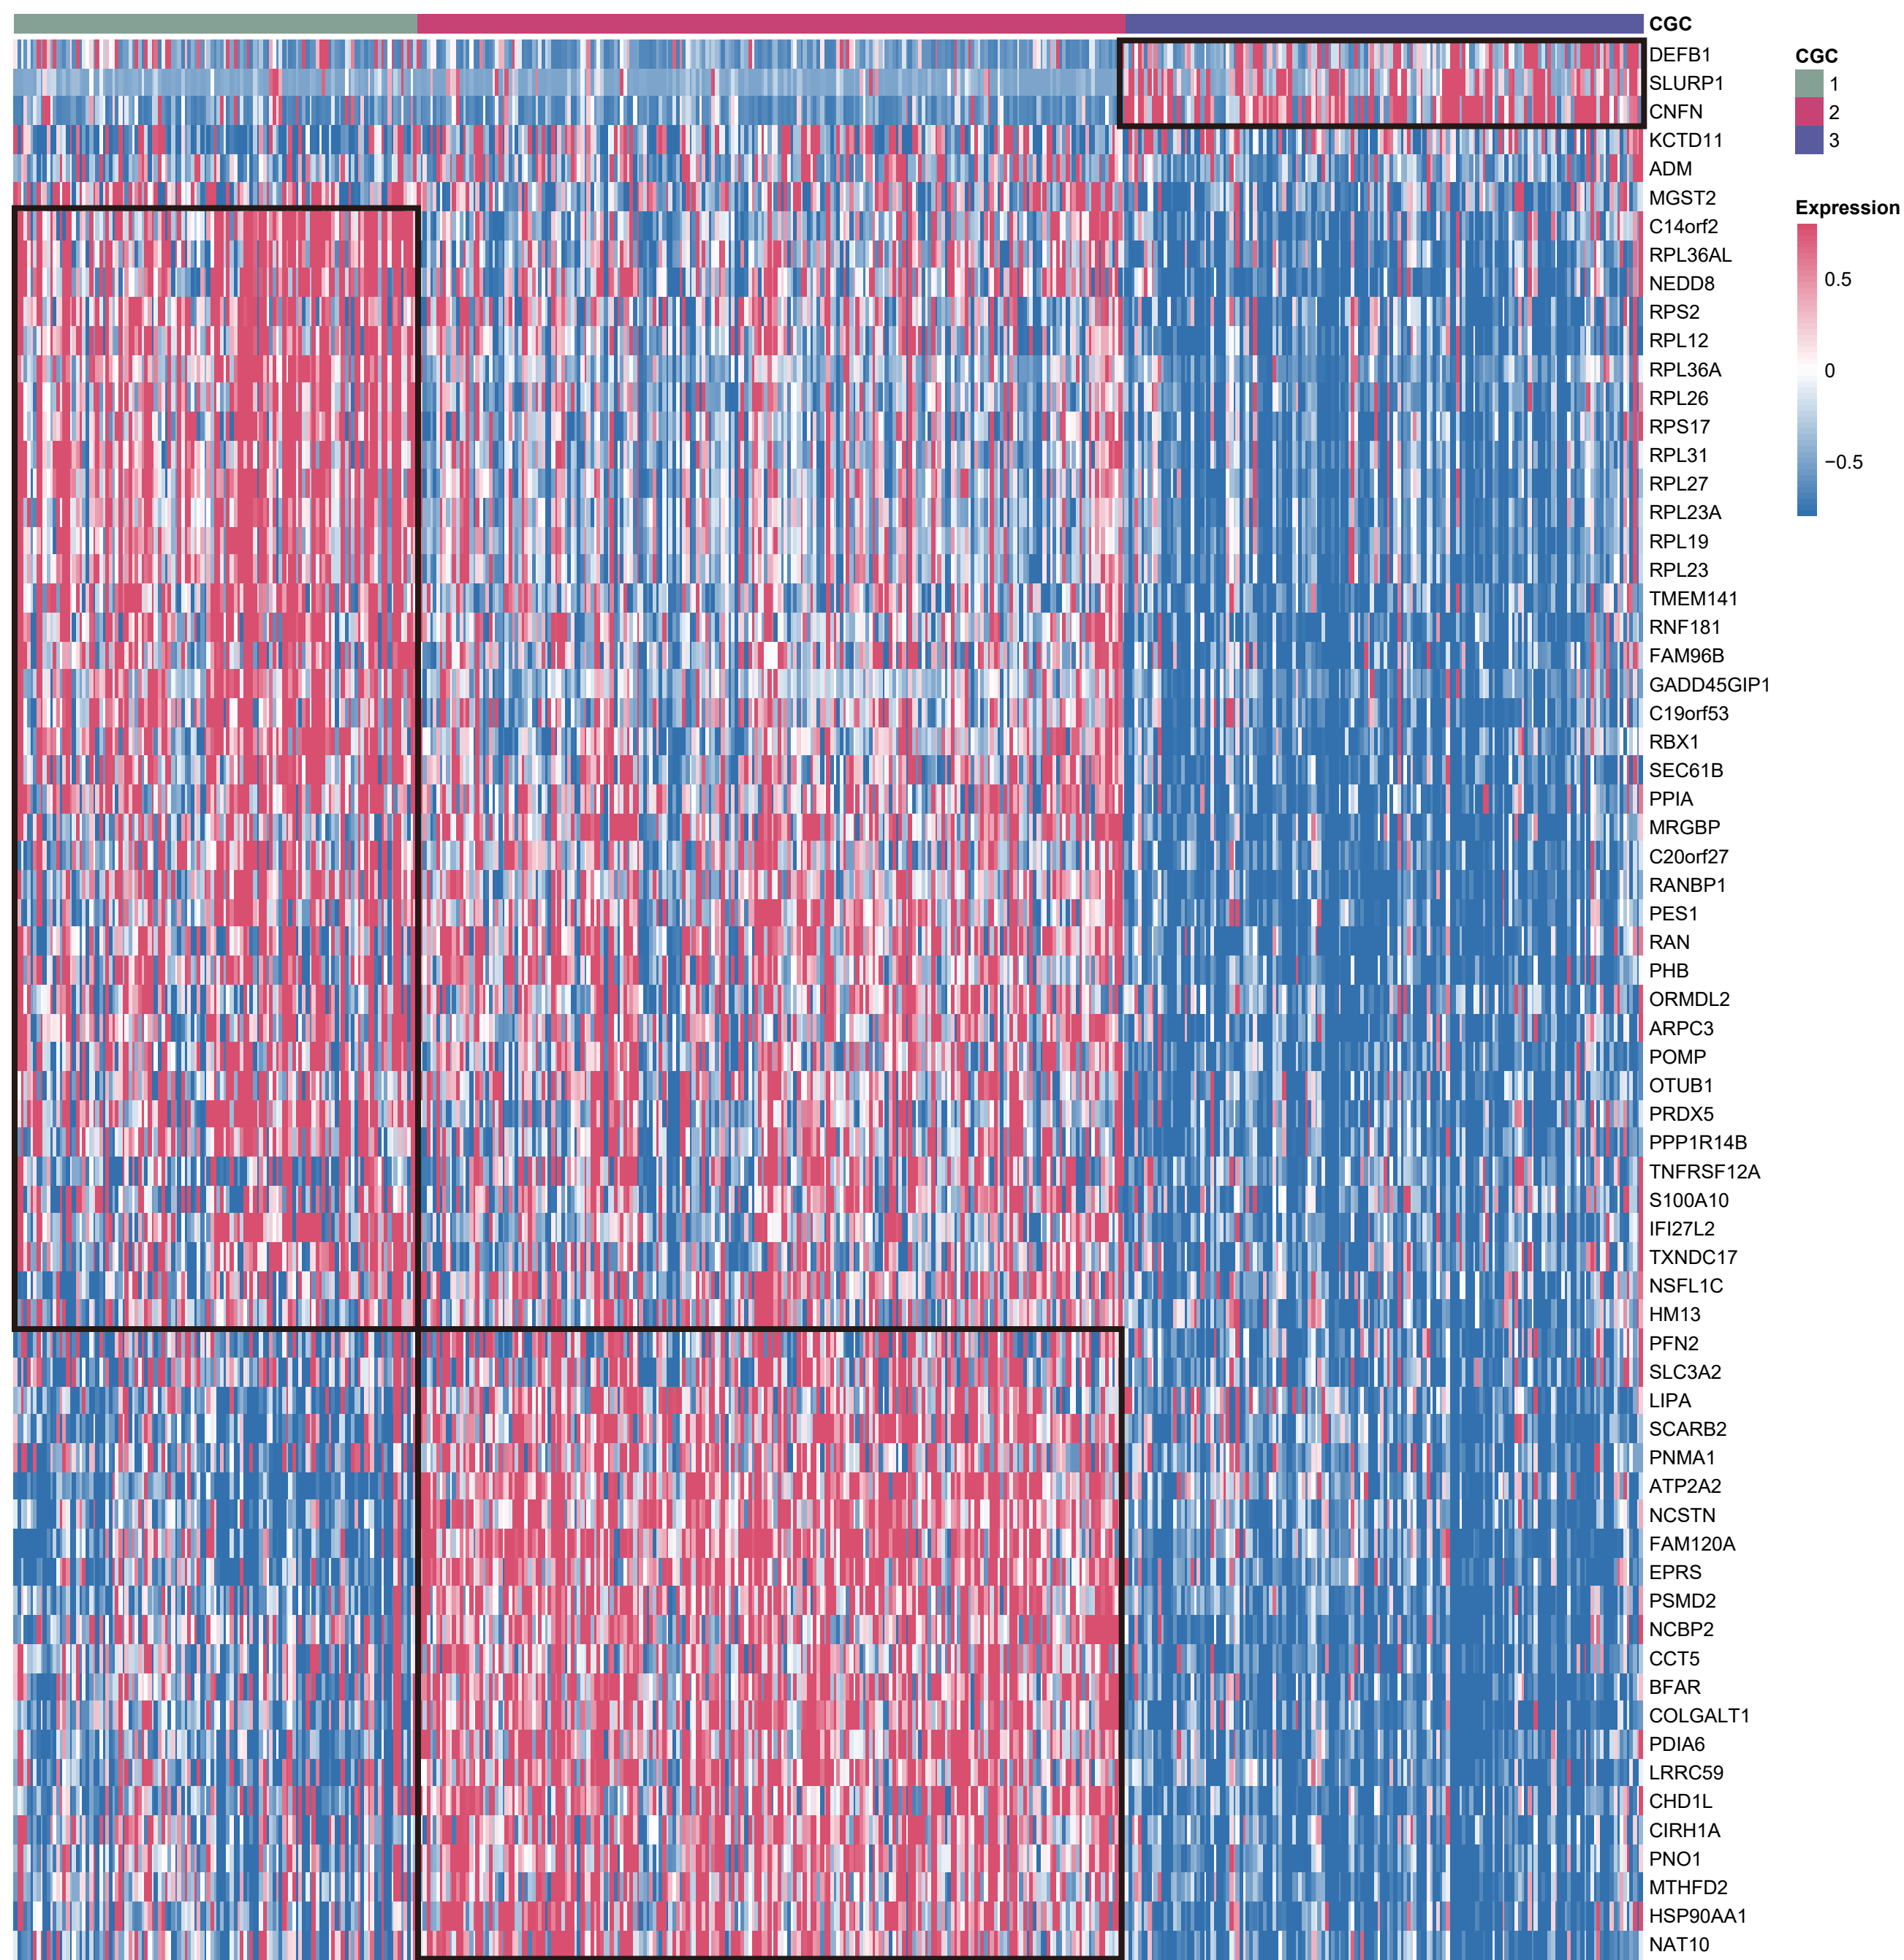

C

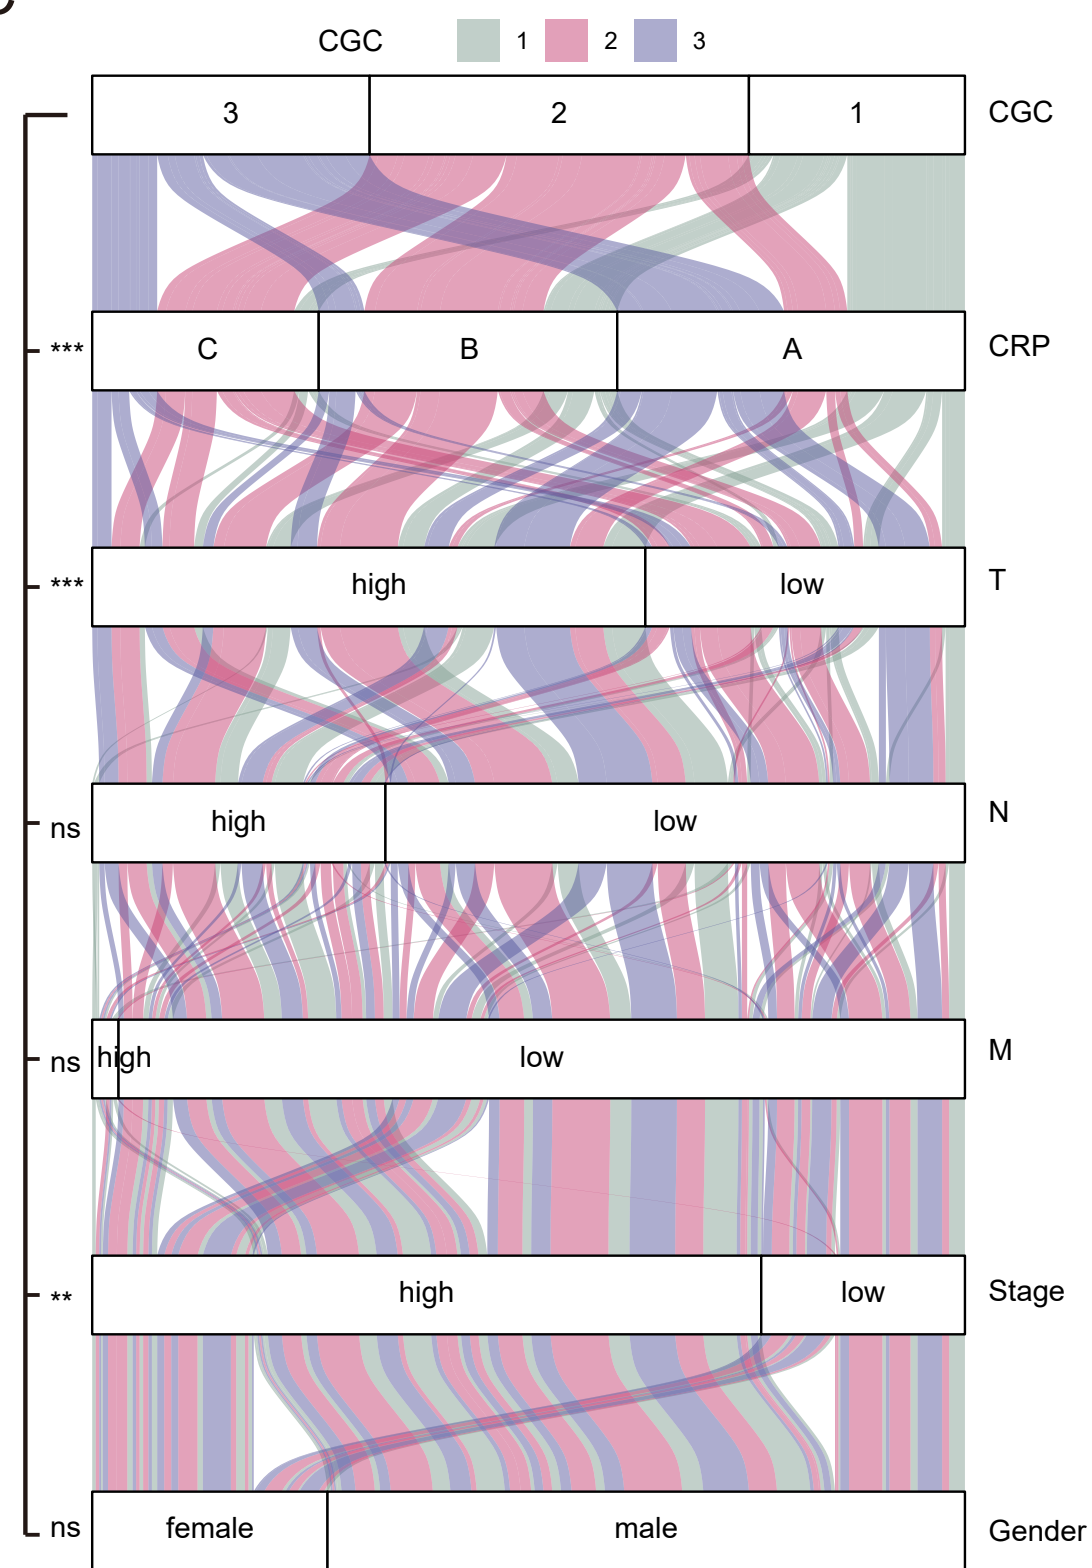

D

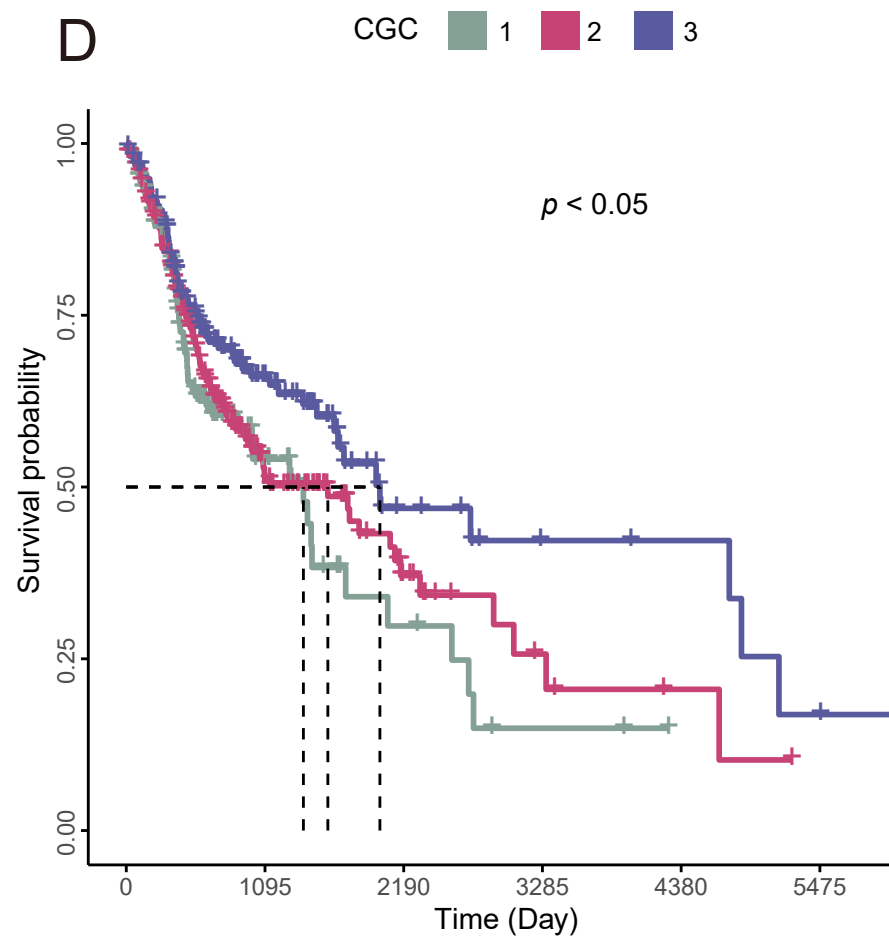

E

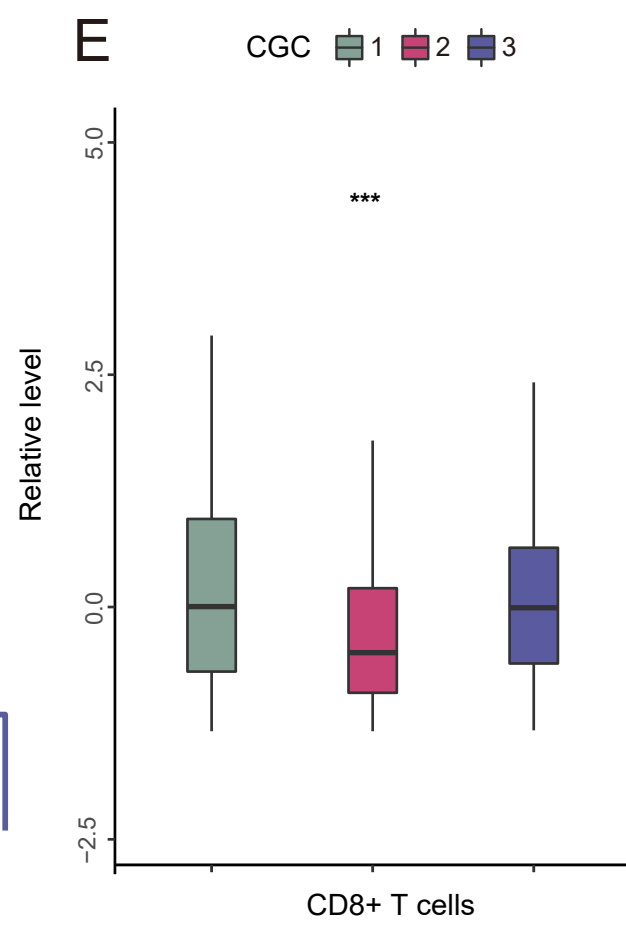

F

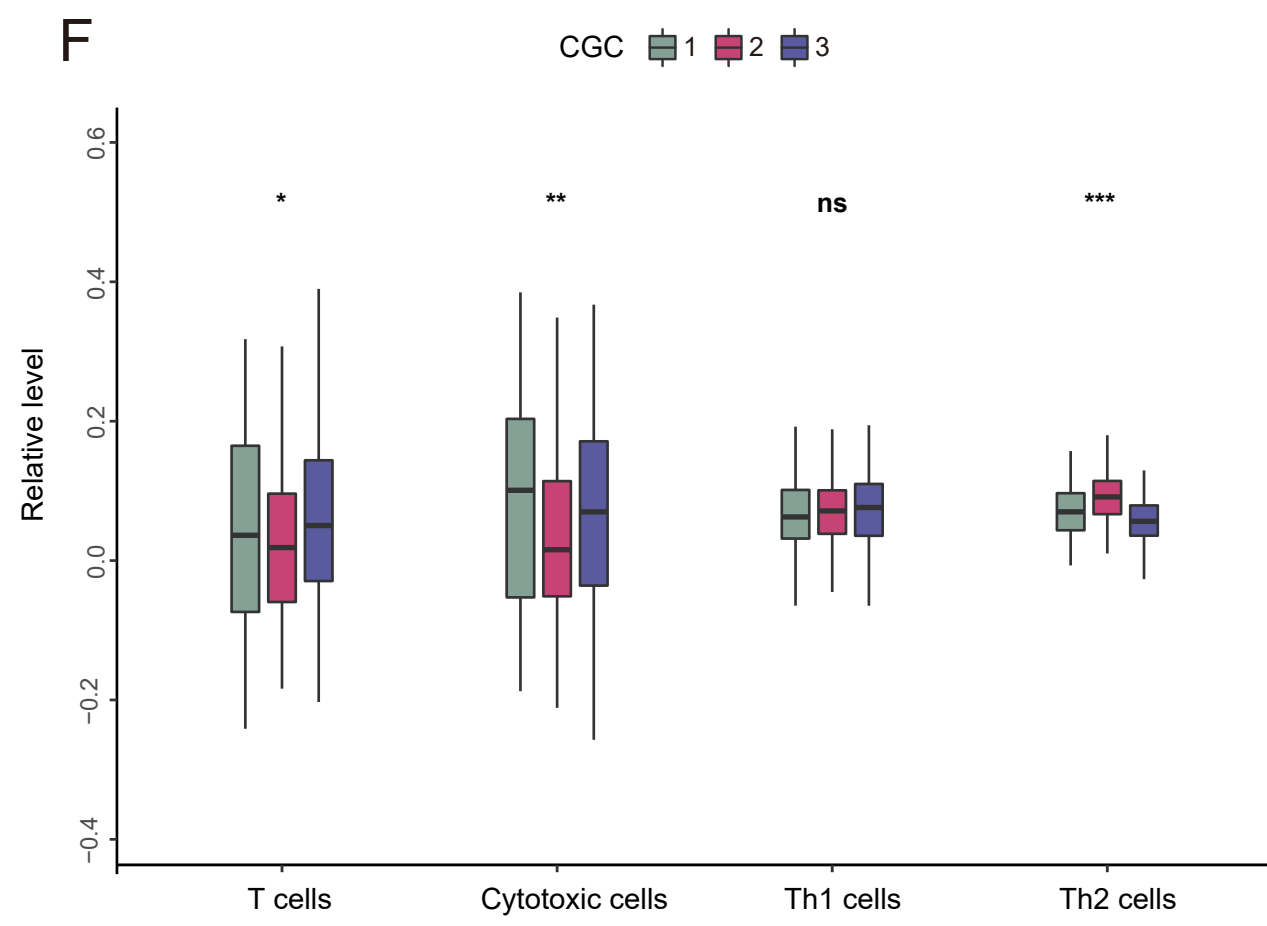

G

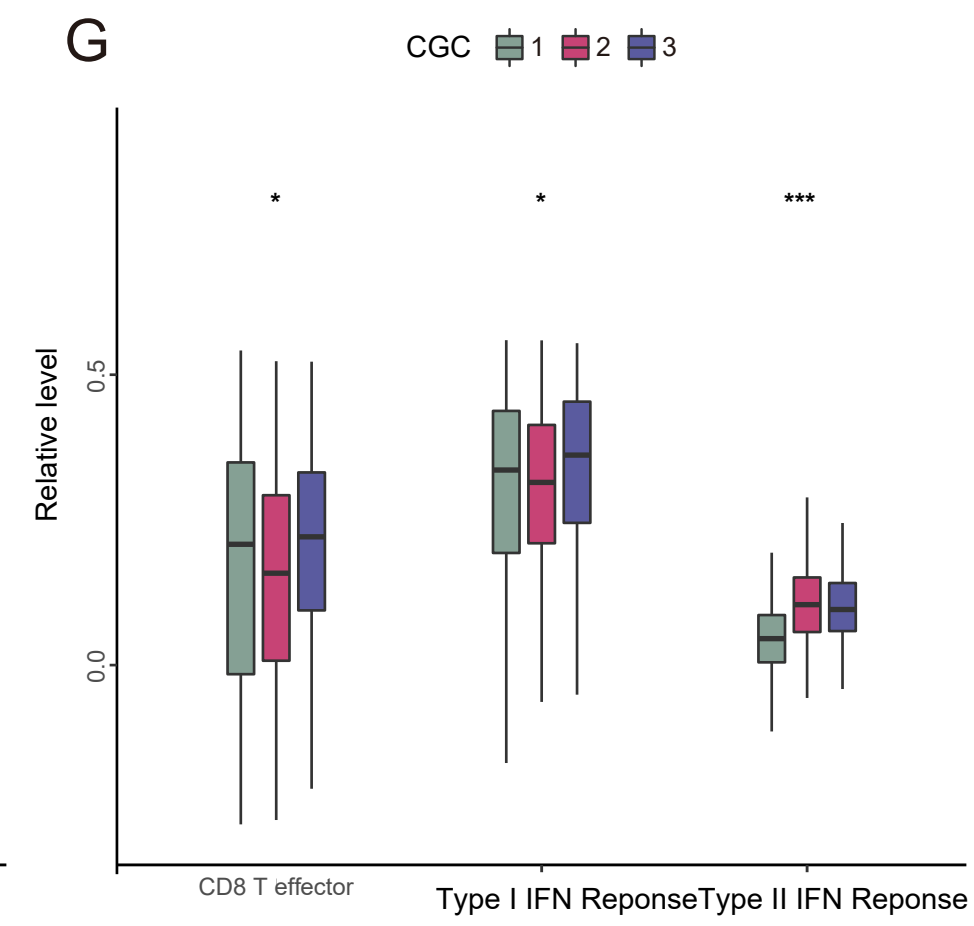

Supplement: f1 [file 9946911.f1.zip]

**A**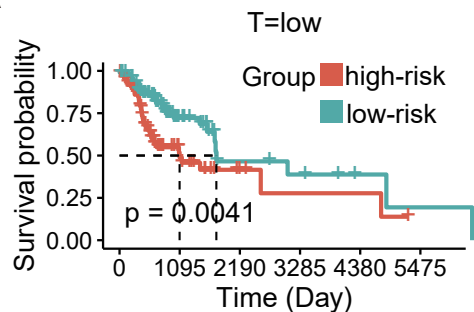**B**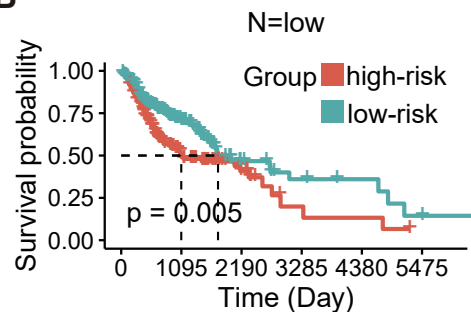**C**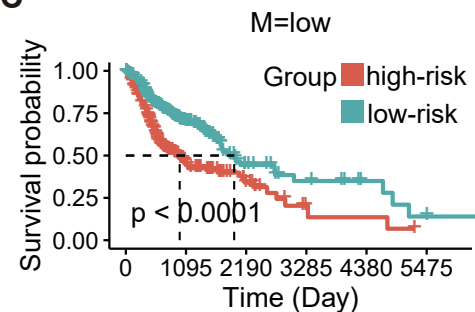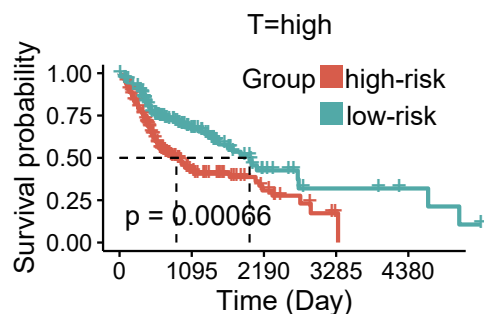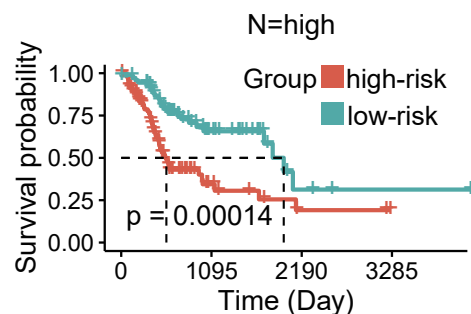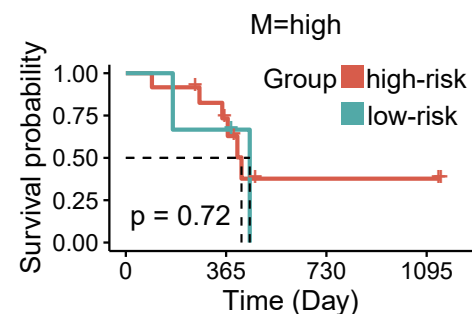**D**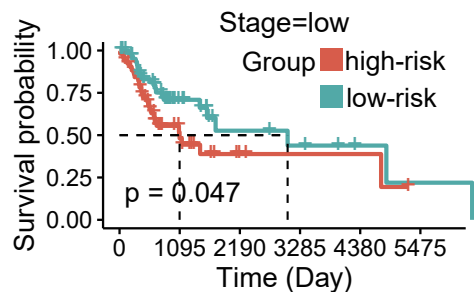**E**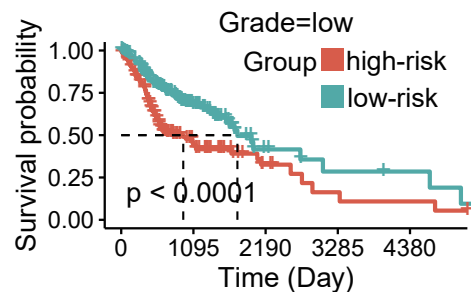**F**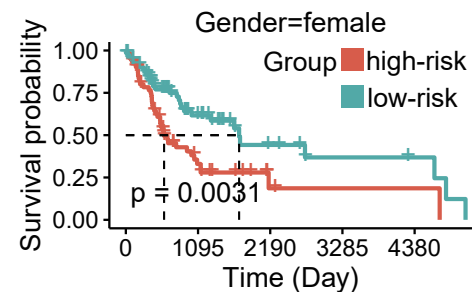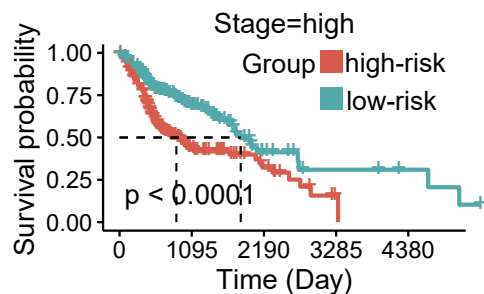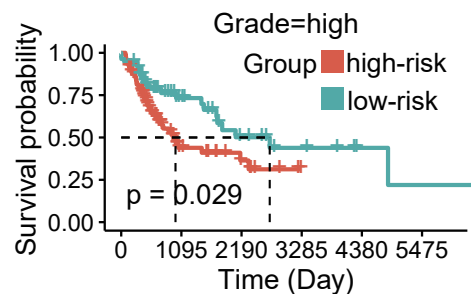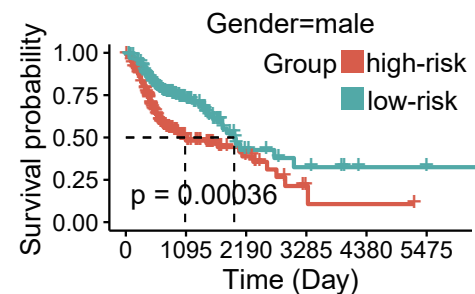

Supplement: f1 [file 9946911.f1.zip]
